# Supplementary material for: Isoscapes of remnant and restored Hawaiian montane forests reveal differences in biological nitrogen fixation and carbon inputs
Source: PeerJ journal article supplement (doi:10.7717/peerj.15468), 2023-06-06
Supplement: Wall_supplem_isoscapes_staffRL.pdf [file Wall_supplem_isoscapes_staffRL.pdf]

# Isoscapes of remnant and restored Hawaiian montane forests reveal differences in biological nitrogen fixation and carbon inputs

Christopher B. Wall, Sean O. I. Swift, Carla M. D'Antonio, Gerhard Gebauer, Nicole A. Hynson

\*corresponding author: cbwall@ucsd.edu

## Supporting Information

### Supplemental figures

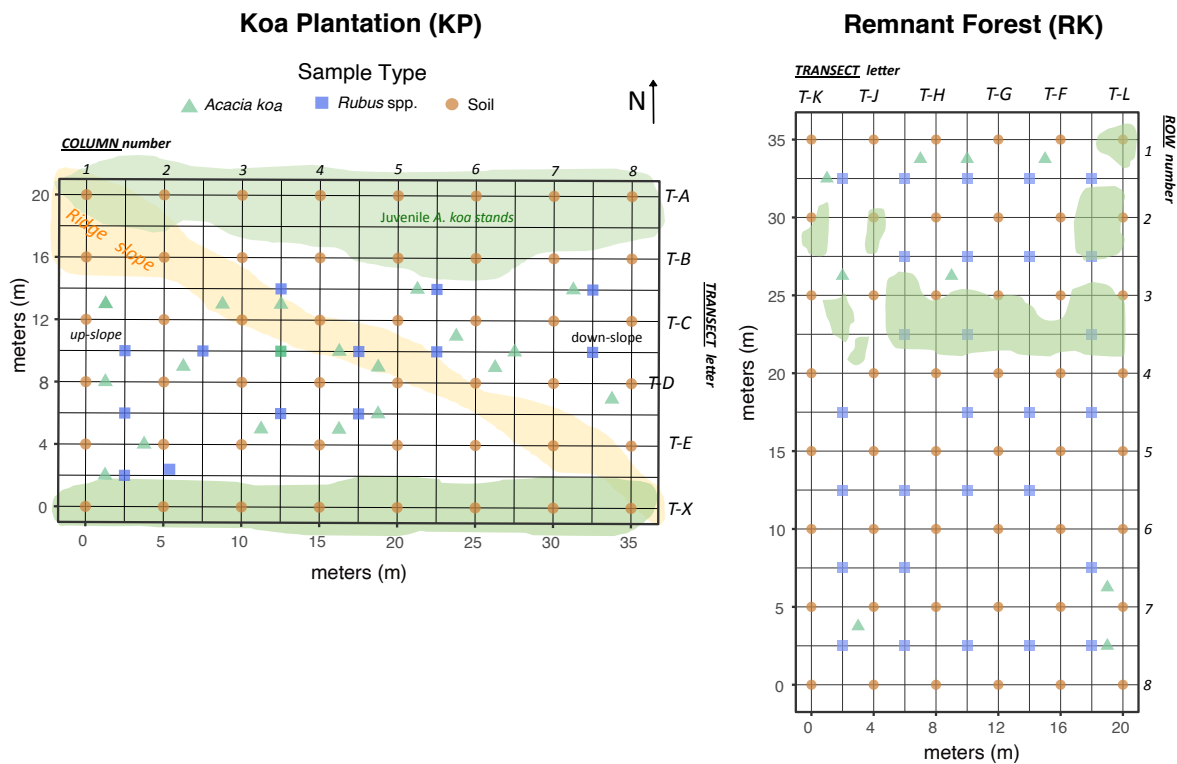

**Figure S1.** Forest plots (20 × 35 m) in the koa plantation (KP) and the remnant forest (RK) showing locations of sample collection (*Acacia koa* and *Rubus* spp. leaves, soil samples), slopes within the Koa Plantation, and patches of juvenile *A. koa* where samples were not collected.

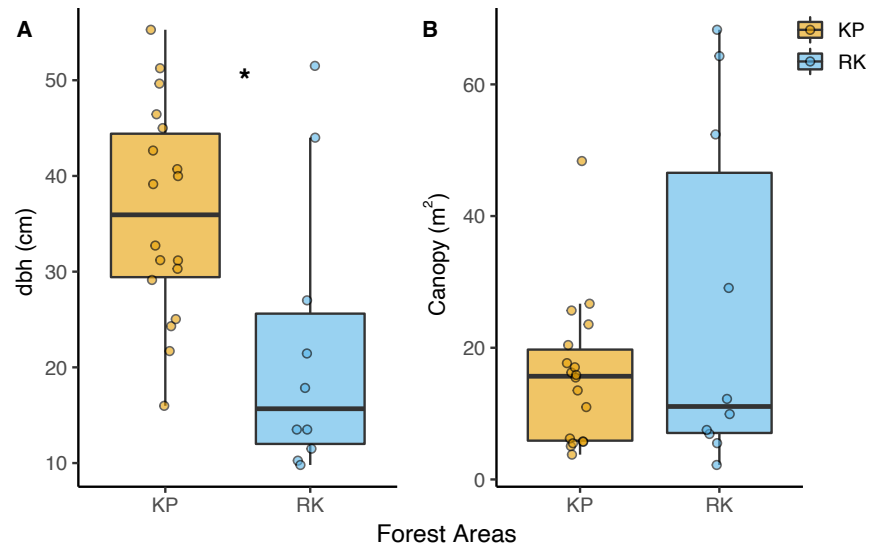

**Figure S2.** (A) Box plots of *Acacia koa* tree diameter at breast height (dbh), and (B) *Acacia koa* tree canopy area (m<sup>2</sup>) in the koa plantation (KP) and remnant (RK) Hakalau forest areas ( $n = 18$  [KP] and 10 [RK]). Asterisks indicate significant plot effects ( $p < 0.05$ ).

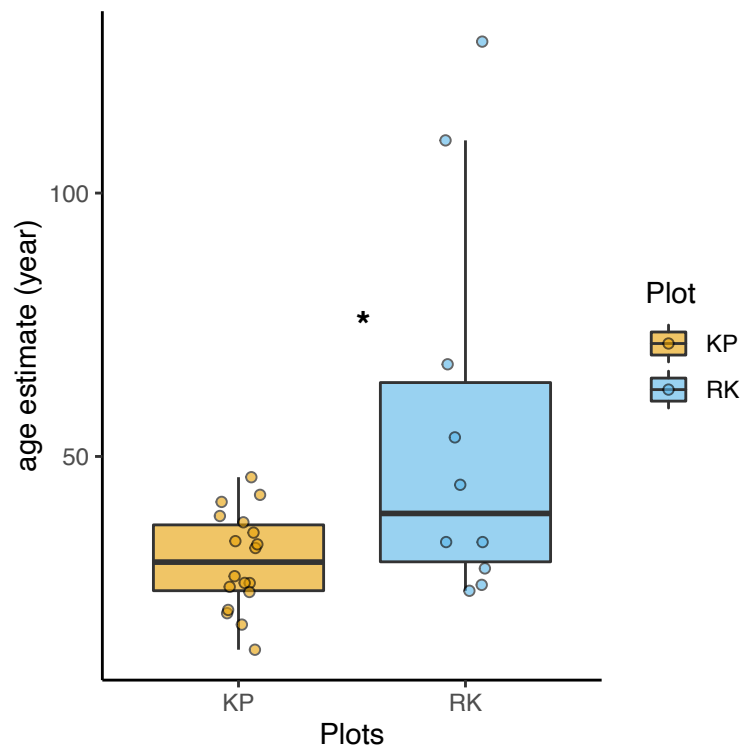

**Figure S3.** Box plot estimates of *Acacia koa* age in the koa plantation (KP) and remnant forest (RK) using diameter at breast height-based growth rates of 12 mm (KP) and 4 mm per year (RK). Asterisks indicate significant plot effects ( $p < 0.05$ ).

**Table S1.** Nonparametric tests of forest type (koa plantation vs. remnant forest) effects on *Acacia koa* diameter at breast height, *A. koa* forest canopy area, and *A. koa* age estimates. Forest type effects on the distribution of interpolated values in nitrogen and carbon isoscapes generated from soil or foliar samples.

| <i>Variable</i>                     | <i>Effect</i> | <i>U</i>            | <i>Z</i> | <i>Effect-size r</i> | <i>p-value</i>   |
|-------------------------------------|---------------|---------------------|----------|----------------------|------------------|
| Diameter at breast height (dbh, cm) | Forest type   | 315                 | 2.589    | 0.489                | <b>0.010</b>     |
| Canopy area (m <sup>2</sup> )       | Forest type   | 252                 | -0.432   | 0.082                | 0.666            |
| dbh-estimated age (years)           | Forest type   | 220                 | -1.966   | 0.372                | <b>0.049</b>     |
| Isoscape: soil                      |               |                     |          |                      |                  |
| $\delta^{15}\text{N}$               | Forest type   | $4.743 \times 10^8$ | -66.868  | 0.281                | <b>&lt;0.001</b> |
| $\delta^{13}\text{C}$               | Forest type   | $8.194 \times 10^8$ | 116.006  | 0.487                | <b>&lt;0.001</b> |
| Isoscape: foliar                    |               |                     |          |                      |                  |
| $\delta^{15}\text{N}$               | Forest type   | $1.429 \times 10^8$ | -129.769 | 0.637                | <b>&lt;0.001</b> |

*U* = U-statistic; *Z* = Z-value. Significant effects ( $p < 0.05$ ) are in bold.

**Table S2.** Linear models testing the effects of forest (remnant forest vs. koa plantation) and sample types (*Acacia koa* leaves, *Rubus* spp. leaves, soil) on response variables.

| <i>Variable</i>              | <i>Effect</i>          | <i>SS</i> | <i>df</i> | <i>F</i> | <i>p-value</i>   |
|------------------------------|------------------------|-----------|-----------|----------|------------------|
| $\delta^{15}\text{N}$        | Sample type            | 670.48    | 2         | 336.862  | <b>&lt;0.001</b> |
|                              | Forest type            | 14.07     | 1         | 14.138   | <b>&lt;0.001</b> |
|                              | Sample $\times$ Forest | 3.64      | 2         | 1.828    | 0.164            |
|                              | Residuals              | 159.23    | 160       |          |                  |
| $\delta^{13}\text{C}$        | Sample type            | 1075.09   | 2         | 635.030  | <b>&lt;0.001</b> |
|                              | Forest type            | 56.56     | 1         | 66.823   | <b>&lt;0.001</b> |
|                              | Sample $\times$ Forest | 2.24      | 2         | 1.322    | 0.269            |
|                              | Residuals              | 135.44    | 160       |          |                  |
| Total nitrogen<br>(mmol/gdw) | Sample type            | 17.544    | 2         | 139.520  | <b>&lt;0.001</b> |
|                              | Forest type            | 0.165     | 1         | 2.621    | 0.107            |
|                              | Sample $\times$ Forest | 0.188     | 2         | 1.492    | 0.228            |
|                              | Residuals              | 10.060    | 160       |          |                  |
| Total carbon<br>(mmol/gdw)   | Sample type            | 16428.6   | 2         | 763.903  | <b>&lt;0.001</b> |
|                              | Forest type            | 98.6      | 1         | 9.166    | <b>0.003</b>     |
|                              | Sample $\times$ Forest | 17.2      | 2         | 0.801    | 0.451            |
|                              | Residuals              | 1720.5    | 160       |          |                  |
| C:N                          | Sample type            | 929.10    | 2         | 107.344  | <b>&lt;0.001</b> |
|                              | Forest type            | 1.06      | 1         | 0.245    | 0.621            |
|                              | Sample $\times$ Forest | 8.84      | 2         | 1.022    | 0.362            |
|                              | Residuals              | 692.43    | 160       |          |                  |

*SS* = sum of squares; *df* = degrees of freedom. Significant effects ( $p < 0.05$ ) are in bold.

**Table S3.** Model parameters used to perform automatic kriging and generation of variograms for spatial interpolation in the koa plantation (KP) and remnant forest (RK).

| <i>isoscape</i> | <i>metric</i>         | <i>site</i> | <i>model</i> | <i>nugget</i> | <i>sill</i> | <i>range (m)</i> | <i>sserr</i> | <i>kappa</i> |
|-----------------|-----------------------|-------------|--------------|---------------|-------------|------------------|--------------|--------------|
| soil            | $\delta^{15}\text{N}$ | KP          | Matern       | 0.00          | 1.44        | 3.43             | 0.01         | 10.00        |
| soil            | $\delta^{15}\text{N}$ | RK          | exponential  | 0.00          | 1.00        | 3.00             | 0.14         | –            |
| soil            | $\delta^{13}\text{C}$ | KP          | Matern       | 0.24          | 1.17        | 5.09             | 0.35         | 10.00        |
| soil            | $\delta^{13}\text{C}$ | RK          | exponential  | 0.00          | 0.80        | 3.00             | 0.12         | –            |
| foliar          | $\delta^{15}\text{N}$ | KP          | exponential  | 0.20          | 0.40        | 3.00             | 0.12         | –            |
| foliar          | $\delta^{15}\text{N}$ | RK          | exponential  | 0.01          | 0.82        | 5.00             | 0.17         | –            |

*isoscape* = input sample type used in the spatial interpolation; *metric* = input data type used in isoscapes; *model* = best fit model iteratively selected using R package automap (Hiemstra et al. 2009); *nugget* = minimum semivariance; *sill* = maximum semivariance; *range* = maximum distance, in meters for the current study; *sserr* = sum of squares between sample and fitted variogram; *kappa* = smoothing parameter in Matern (Ste) model.
